# Supplementary material
Source: publisher site journal article supplement (https://www.spandidos-publications.com/7548/downloadSupplementary)
Supplement: Supplementary file 1 [file downloadSupplementary]

Appendix. Searching method for PubMed, Central, Scopus and CINAHL (on October 22, 2022).

| A, PubMed     |                                                                                                                                                                                                                            |
|---------------|----------------------------------------------------------------------------------------------------------------------------------------------------------------------------------------------------------------------------|
| Search number | Query                                                                                                                                                                                                                      |
| 1             | "Coronary Artery Bypass"[Mesh] OR "Cardiovascular Surgical Procedures"[Mesh]                                                                                                                                               |
| 2             | coronary artery disease[Title/Abstract]                                                                                                                                                                                    |
| 3             | (Coronary artery bypass graft[Title/Abstract]) OR (CABG[Title/Abstract])                                                                                                                                                   |
| 4             | (#1 AND #2) AND #3                                                                                                                                                                                                         |
| 5             | "Stem Cells"[Mesh] OR "Stem Cell Research"[Mesh]                                                                                                                                                                           |
| 6             | (cardiac function*[Title/Abstract] OR heart function*[Title/Abstract] OR mortality[Title/Abstract]) OR ("Heart Function Tests"[Mesh]) OR "Mortality"[Mesh]                                                                 |
| 7             | #5 AND #6                                                                                                                                                                                                                  |
| 8             | (Randomized Controlled Trial[Publication Type] OR Controlled Clinical Trial[Publication Type] OR Randomized Controlled Trials[MeSH Terms]) OR (randomized clinical trial[Title/Abstract] OR control group[Title/Abstract]) |
| 9             | ("Observational Study"[Publication Type] OR "Observational Studies as Topic"[Mesh] OR "Epidemiologic Studies"[Mesh]) OR (observational study[Title/Abstract])                                                              |
| 10            | #7 AND (#8 AND #9)                                                                                                                                                                                                         |

| B, Central    |                                                                         |
|---------------|-------------------------------------------------------------------------|
| Search number | Query                                                                   |
| 1             | MeSH descriptor: [Coronary Artery Bypass] explode all trees             |
| 2             | MeSH descriptor: [Cardiovascular Surgical Procedures] explode all trees |
| 3             | ("coronary artery bypass graft"):ti,ab,kw OR (CABG):ti,ab,kw            |
| 4             | (coronary artery disease):ti,ab,kw                                      |
| 5             | ((#1 OR #2) AND #3) AND #4                                              |
| 6             | MeSH descriptor: [Stem Cells] explode all trees                         |
| 7             | MeSH descriptor: [Stem Cell Research] explode all trees                 |
| 8             | #6 OR #7                                                                |
| 9             | MeSH descriptor: [Heart Function Tests] explode all trees               |
| 10            | (cardiac function*):ti,ab,kw OR (heart function*):ti,ab,kw              |
| 11            | MeSH descriptor: [Mortality] explode all trees                          |
| 12            | (#5 AND #8) AND (#9 OR #10 OR #11)                                      |

| C, Scopus                                                                                                                                                                                                                                                                                                                                                                                                                                                                                                                                            |  |
|------------------------------------------------------------------------------------------------------------------------------------------------------------------------------------------------------------------------------------------------------------------------------------------------------------------------------------------------------------------------------------------------------------------------------------------------------------------------------------------------------------------------------------------------------|--|
| ((( TITLE-ABS-KEY ( cardiac AND function* ) OR TITLE-ABS-KEY ( heart AND function* ) OR TITLE-ABS-KEY ( heart AND function AND test* ) OR TITLE-ABS-KEY ( mortality ))) AND ((( TITLE-ABS-KEY ( coronary AND artery AND bypass AND graft ) OR TITLE-ABS-KEY ( cabg ))) AND (( TITLE-ABS-KEY ( coronary AND artery AND bypass ) OR TITLE-ABS-KEY ( cardiovascular AND surgical AND procedures ))) AND ( TITLE-ABS-KEY ( coronary AND artery AND disease ))) AND (( TITLE-ABS-KEY ( stem AND cell* ) OR TITLE-ABS-KEY ( stem AND cell AND research ))) |  |

))) AND ((( TITLE-ABS-KEY ( observational AND stud\* ) OR TITLE-ABS-KEY ( epidemiologic AND stud\* ) OR TITLE-ABS-KEY ( cohort AND study ) OR TITLE-ABS-KEY ( cross-sectional AND study ) OR TITLE-ABS-KEY ( case-control AND study ))) OR (( TITLE-ABS-KEY ( randomized AND controlled AND trial ) OR TITLE-ABS-KEY ( randomised AND controlled AND trial ) OR TITLE-ABS-KEY ( controlled AND clinical AND trial ) OR TITLE-ABS-KEY ( randomized AND clinical AND trial ) OR TITLE-ABS-KEY ( control AND group ))) AND ( LIMIT-TO ( DOCTYPE "ar" ) )

| D, CINAHL     |                                                                                                                                                                                                                                                                                             |
|---------------|---------------------------------------------------------------------------------------------------------------------------------------------------------------------------------------------------------------------------------------------------------------------------------------------|
| Search number | Query                                                                                                                                                                                                                                                                                       |
| S1            | TI coronary artery disease OR AB coronary artery disease<br>Expanders - Apply equivalent subjects<br>Search modes - Find all my search terms                                                                                                                                                |
| S2            | TI ( coronary artery bypass graft or cabg or coronary artery bypass surgery or cardiac surgery )<br>OR AB ( coronary artery bypass graft or cabg or coronary artery bypass surgery or cardiac surgery )<br>Expanders - Apply equivalent subjects<br>Search modes - Find all my search terms |
| S3            | S1 AND S2<br>Expanders - Apply equivalent subjects<br>Search modes - Find all my search terms                                                                                                                                                                                               |
| S4            | TI stem cells OR AB Stem Cells<br>Expanders - Apply equivalent subjects<br>Search modes - Find all my search terms                                                                                                                                                                          |
| S5            | S3 AND S4<br>Expanders - Apply equivalent subjects<br>Search modes - Find all my search terms                                                                                                                                                                                               |

CABG, coronary artery bypass grafting; CINAHL, Cumulative Index to Nursing and Allied Health Literature.
